# Supplementary material
Source: PubMed Central journal article supplement (PMC9070555)
Supplement: NIHMS1632303-supplement-Supplementary_Material_for_Lin__et_al_.pdf [file NIHMS1632303-supplement-Supplementary_Material_for_Lin__et_al_.pdf]

Supplementary material for Lin, et al., “Progressive RPE atrophy and Photoreceptor death in KIZ-associated Autosomal Recessive Retinitis Pigmentosa”, *Ophthalmic Genetics*, 2020.

**Supplemental Table 1.** Ellipsoid zone (EZ) line length ( $\mu\text{m}$ ) of patient A-II:2's right eye (OD) and left eye (OS)

| <b>A-II:2<br/>year</b> | <b>OD</b> | <b>OS</b> |
|------------------------|-----------|-----------|
| 2013                   | 655       | 703       |
| 2015                   | 596       | 625       |
| 2016                   | 579       | 615       |
| 2017                   | 563       | 613       |
| 2018                   | 554       | 580       |

**Supplemental Table 2.** Ellipsoid zone (EZ) line length ( $\mu\text{m}$ ) of patient B-II:1's right eye (OD) and left eye (OS)

| <b>B-II:1<br/>year</b> | <b>OD</b> | <b>OS</b> |
|------------------------|-----------|-----------|
| 2015                   | 1332      | 1452      |
| 2016                   | 921       | 1362      |
| 2017                   | 606       | 1143      |
| 2018                   | 528       | 1023      |

**Supplemental Table 3.** Ellipsoid zone (EZ) line length ( $\mu\text{m}$ ) of patient D-II:5's right eye (OD) and left eye (OS)

| <b>D-II:5<br/>year</b> | <b>OD</b> | <b>OS</b> |
|------------------------|-----------|-----------|
| 2005                   | NA        | NA        |
| 2006                   | NA        | NA        |
| 2007                   | NA        | NA        |
| 2009                   | NA        | NA        |
| 2011                   | 705       | 615       |
| 2018                   | 378       | 393       |
| 2019                   | 331       | 319       |

NA = not available.
